# Supplementary material
Source: MDPI journal article supplement (https://www.mdpi.com/2071-1050/10/5/1523)
Supplement: s1 [file s1]

# Supplementary Materials

## Measuring the Sustainability of Construction Projects throughout Their Lifecycle: A Taiwan Lesson

Wen-der Yu <sup>1,\*</sup>, Shao-tsai Cheng <sup>2</sup>, Wei-cheng Ho <sup>3</sup> and Yu-hao Chang <sup>2</sup>

<sup>1</sup> Department of Construction Engineering, Chaoyang University of Technology, Taichung 41349, Taiwan

<sup>2</sup> Department of Construction Management, Chung Hua University, Hsinchu 30012, Taiwan; shaotsai@chu.edu.tw (S.C.); g22331232004@yahoo.com.tw (Y.C.)

<sup>3</sup> Department of Civil Engineering, Chung Hua University, Hsinchu 30012, Taiwan; jp6899@yahoo.com.tw

\* Correspondence: wenderyu@cyut.edu.tw

Received: 7 April 2018; Accepted: 8 May 2018; Published: 11 May 2018

| Pillar | Category | Su-Category | Indicator | Definition                              | Unit                                         | Initialization | Planning | Construction | Control | Turn Over | Operation | Maintenance | Demolition |
|--------|----------|-------------|-----------|-----------------------------------------|----------------------------------------------|----------------|----------|--------------|---------|-----------|-----------|-------------|------------|
| E      | E1       | E1a         | E1a1      | Project Development Area Ratio          | %                                            | 92%            | 100%     | 32%          | 29%     | 21%       | 16%       | 0%          | 0%         |
|        |          | E1b         | E1b1      | Ratio of Borrowed Soi                   | %                                            | 16%            | 82%      | 68%          | 8%      | 0%        | 0%        | 8%          | 0%         |
|        |          |             | E1b2      | Ratio of Concrete Usage                 | %                                            | 18%            | 95%      | 87%          | 68%     | 8%        | 0%        | 11%         | 3%         |
|        |          | E1c         | E1c1      | Measure of Water Saving                 | Y/N                                          | 40%            | 90%      | 84%          | 45%     | 16%       | 58%       | 42%         | 3%         |
|        |          |             | E1c2      | Measure of Water Recycle                | Y/N                                          | 34%            | 82%      | 87%          | 53%     | 21%       | 55%       | 55%         | 3%         |
|        |          | E1d         | E1d1      | Measure of Energy Saving                | Y/N                                          | 24%            | 76%      | 71%          | 39%     | 24%       | 55%       | 37%         | 3%         |
|        |          |             | E1d2      | Usage of Green Energy                   | Y/N                                          | 32%            | 55%      | 34%          | 18%     | 16%       | 34%       | 16%         | 3%         |
|        | E2       | E2a         | E2a1      | Measure of Air Pollution Prevention     | Y/N                                          | 16%            | 45%      | 76%          | 32%     | 13%       | 8%        | 13%         | 13%        |
|        |          |             | E2a2      | Usage of Low Air Pollution Method       | Y/N                                          | 11%            | 66%      | 79%          | 42%     | 13%       | 0%        | 8%          | 5%         |
|        |          | E2b         | E2b1      | Measure of Water Pollution Reduction    | Y/N                                          | 21%            | 66%      | 79%          | 45%     | 18%       | 42%       | 13%         | 8%         |
|        |          | E2c         | E2c1      | Measure of Solid Waste Reduction        | Y/N                                          | 16%            | 42%      | 68%          | 42%     | 16%       | 32%       | 24%         | 26%        |
|        |          | E2d         | E2d1      | Measure of Noise Reduction              | Y/N                                          | 11%            | 61%      | 82%          | 53%     | 13%       | 11%       | 18%         | 16%        |
|        |          | E2e         | E2e1      | Alternative for Toxicant                | Y/N                                          | 13%            | 66%      | 58%          | 21%     | 5%        | 8%        | 11%         | 5%         |
|        |          |             | E2e2      | Usage of Green Labeled Product          | Y/N                                          | 21%            | 87%      | 79%          | 50%     | 24%       | 37%       | 21%         | 3%         |
|        |          | E2f         | E2f1      | Low GHG Emission Method                 | Y/N                                          | 13%            | 71%      | 76%          | 37%     | 5%        | 18%       | 3%          | 3%         |
|        | E3       | E3a         | E3a1      | Ratio of Planting Area                  | %                                            | 29%            | 95%      | 92%          | 45%     | 26%       | 32%       | 39%         | 0%         |
|        |          |             | E3a2      | Establishment of Habitation             | Y/N                                          | 50%            | 76%      | 61%          | 48%     | 29%       | 32%       | 26%         | 24%        |
|        |          | E3b         | E3b1      | Avoid Bio-sensitive Area                | Y/N                                          | 55%            | 63%      | 42%          | 34%     | 24%       | 24%       | 18%         | 18%        |
|        |          |             | E3b2      | Avoid Disaster-sensitive Area           | Y/N                                          | 55%            | 61%      | 42%          | 34%     | 26%       | 21%       | 18%         | 16%        |
|        |          | E3c         | E3c1      | Usage of Vertical Green Planting        | Y/N                                          | 16%            | 61%      | 50%          | 13%     | 8%        | 8%        | 11%         | 0%         |
|        | S        | S1          | S1a       | S1a1                                    | Improvement of Average Occupation Area (Y/N) | Y/N            | 42%      | 76%          | 21%     | 8%        | 13%       | 37%         | 13%        |
| S1a2   |          |             |           | Improvement of Infrastructure           | Y/N                                          | 39%            | 76%      | 24%          | 13%     | 16%       | 29%       | 29%         | 3%         |
| S1a3   |          |             |           | Ratio of Certified Green Building Items | %                                            | 61%            | 71%      | 55%          | 42%     | 45%       | 32%       | 11%         | 0%         |
| S1b    |          |             | S1b1      | Prevention of Disaster                  | Y/N                                          | 61%            | 71%      | 68%          | 29%     | 21%       | 24%       | 18%         | 5%         |
|        |          |             | S1b2      | Protection of Stakeholders Safety       | Y/N                                          | 71%            | 76%      | 76%          | 68%     | 50%       | 61%       | 34%         | 24%        |
| S2     |          | S2a         | S2a1      | Measure of Conserving Cultural Monument | Y/N                                          | 42%            | 55%      | 42%          | 24%     | 13%       | 50%       | 26%         | 8%         |
| S3     |          | S3a         | S3a1      | Free Access for the Disabled            | Y/N                                          | 26%            | 84%      | 68%          | 39%     | 32%       | 58%       | 26%         | 11%        |
| S4     |          | S4a         | S4a1      | Participation of Local Labor            | Y/N                                          | 39%            | 66%      | 55%          | 29%     | 34%       | 53%       | 26%         | 18%        |
|        |          |             | S4a2      | Fair Sharing of Benefits                | Y/N                                          | 53%            | 55%      | 32%          | 18%     | 18%       | 21%       | 13%         | 16%        |
| EC     | EC1      | EC1a        | EC1a1     | Ratio of Local Employment               | %                                            | 16%            | 18%      | 34%          | 18%     | 0%        | 13%       | 13%         | 24%        |
|        |          |             | EC1a2     | Self-Liquidation Ratio                  | %                                            | 29%            | 39%      | 11%          | 24%     | 11%       | 8%        | 8%          | 0%         |
|        |          |             | Overall   |                                         |                                              |                |          | 34%          | 69%     | 59%       | 34%       | 19%         | 28%        |

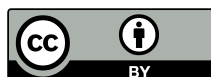

© 2018 by the authors. Licensee MDPI, Basel, Switzerland. This article is an open access article distributed under the terms and conditions of the Creative Commons Attribution (CC BY) license (<http://creativecommons.org/licenses/by/4.0/>).
